# Supplementary material for: Enhancing Production of Medium-Chain-Length Polyhydroxyalkanoates from Pseudomonas sp. SG4502 by tac Enhancer Insertion
Source: MDPI journal article supplement (doi:10.3390/polym15102290), 2023-05-12
Supplement: s1 [file s1]

## Supporting Information

# Enhancing Production of Medium-chain-length Polyhydroxyalkanoates from *Pseudomonas* sp. SG4502 by tac Enhancer Insertion

Linxin Song <sup>1,2</sup>, Ming Wang <sup>3</sup>, Dengbin Yu <sup>1,2</sup>, Yu Li <sup>1,4</sup>, Hongwen Yu <sup>5</sup> and Xuerong Han <sup>1,3\*</sup>

<sup>1</sup> International Cooperation Research Center of China for New Germplasm Breeding of Edible Mushrooms, Jilin Agricultural University, Changchun 130118, China

<sup>2</sup> Jilin Province Key Laboratory of Fungal Phenomics, Jilin Agricultural University, Changchun 130118, China

<sup>3</sup> School of Life Science and Technology Changchun University of Science and Technology Changchun 130022, China

<sup>4</sup> Tianjin Institute of Industrial Biotechnology, Chinese Academy of Sciences, Tianjin 300308, China

<sup>5</sup> Key Laboratory of Wetland Ecology and Environment, State Key Laboratory of Black Soils Conservation and Utilization, Northeast Institute of Geography and Agroecology, Chinese Academy of Sciences, Changchun 130102, China

\* Correspondence: hanxuerong@jlau.edu.cn

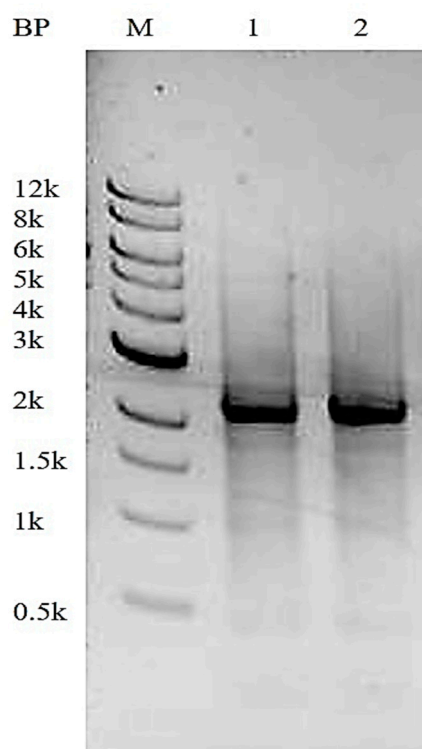

**Figure S1.** Electrophoretic results of target fragment *C1ZC2* M: DNA Marker GsDL10001, 1,2: PCR product of *C1ZC2* gene.

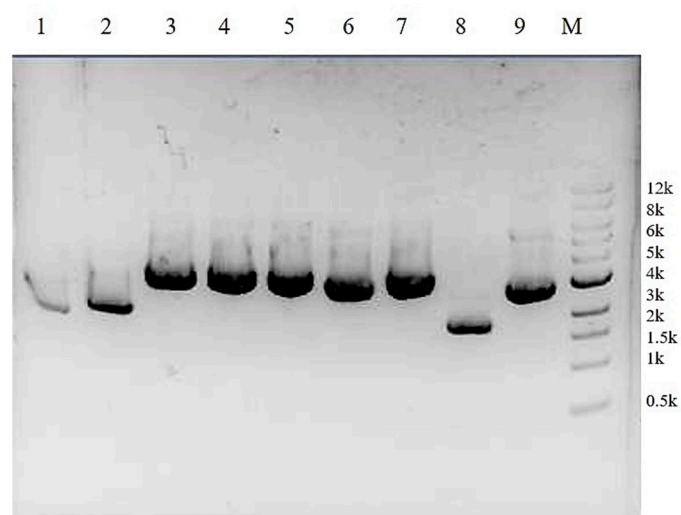

**Figure S2.** Electrophoretic results of recombinant plasmid pUC19-*C1ZC2*. 1: pUC19 plasmid; 2-9: recombinant plasmid pUC19-*C1ZC2*; M: DNA Marker GsDL10001.

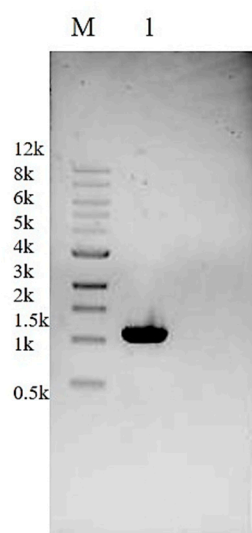

**Figure S3.** PCR electrophoresis results of *smr* gene. M: DNA Marker GsDL10001; 1: PCR product of *smr* gene.

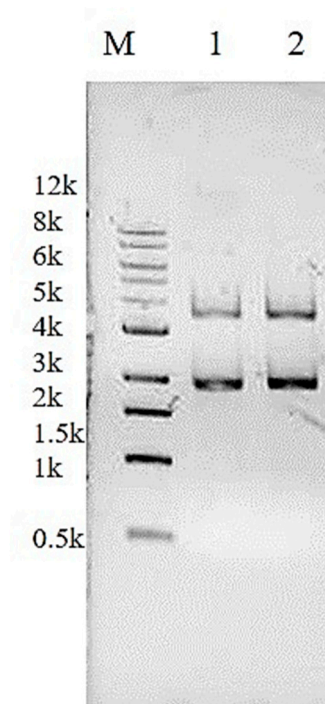

**Figure S4.** Double enzyme digestion electrophoresis results of recombinant plasmid pUC19-*C1ZC2-smr*. M: DNA Marker GsDL10001; 1,2: Double enzyme digestion products of recombinant plasmid pUC19-*C1ZC2-smr*.

Range 1: 107 to 898 [Graphics](#) [New Match](#) [Previous Match](#)

| Score          | Expect                                                      | Identities    | Gaps      | Strand     |
|----------------|-------------------------------------------------------------|---------------|-----------|------------|
| 1463 bits(792) | 0.0                                                         | 792/792(100%) | 0/792(0%) | Plus/Minus |
| Query 1        | TTATTTGCCGACTACCTTGGTGATCTCGCCTTTCACGTAGTGGACAAATCTTCCAACTG | 60            |           |            |
| Sbjct 898      | TTATTTGCCGACTACCTTGGTGATCTCGCCTTTCACGTAGTGGACAAATCTTCCAACTG | 839           |           |            |
| Query 61       | ATCTGCGCGGAGGCCAAGCGATCTTCTTGTGCAAGATAAGCCTGTAGCTTCAAG      | 120           |           |            |
| Sbjct 838      | ATCTGCGCGGAGGCCAAGCGATCTTCTTGTGCAAGATAAGCCTGTAGCTTCAAG      | 779           |           |            |
| Query 121      | TATGACGGGCTGATACTGGGCCGGCAGGCGCTCATTGCCAGTCGGCAGCGACATCCTT  | 180           |           |            |
| Sbjct 778      | TATGACGGGCTGATACTGGGCCGGCAGGCGCTCATTGCCAGTCGGCAGCGACATCCTT  | 719           |           |            |
| Query 181      | CGGCGCGATTGTCGGGTTACTGCGCTGTACCAATGCGGGACAACGTAAGCACTACATT  | 240           |           |            |
| Sbjct 718      | CGGCGCGATTGTCGGGTTACTGCGCTGTACCAATGCGGGACAACGTAAGCACTACATT  | 659           |           |            |
| Query 241      | TGCTCATCGCAGCCCAAGTCGGGCGCGAGTTCCATAGCGTTAAGGTTTATTAGCGC    | 300           |           |            |
| Sbjct 658      | TGCTCATCGCAGCCCAAGTCGGGCGCGAGTTCCATAGCGTTAAGGTTTATTAGCGC    | 599           |           |            |
| Query 301      | CTCAATAGATCCTGTTTCAAGAACCGGATCAAGAGTTCTCCGCCGCTGGACCTACAA   | 360           |           |            |
| Sbjct 598      | CTCAATAGATCCTGTTTCAAGAACCGGATCAAGAGTTCTCCGCCGCTGGACCTACAA   | 539           |           |            |
| Query 361      | GGCAACGCTATGTTCTCTGCTTTTGTGCAAGATAGCCAGATCAATGTCGATCGTGGC   | 420           |           |            |
| Sbjct 538      | GGCAACGCTATGTTCTCTGCTTTTGTGCAAGATAGCCAGATCAATGTCGATCGTGGC   | 479           |           |            |
| Query 421      | TGGCTGAAGATACCTGCAAGATGTCATTGCGCTGCCATTCTCCAAATGCAAGTTCCG   | 480           |           |            |
| Sbjct 478      | TGGCTGAAGATACCTGCAAGATGTCATTGCGCTGCCATTCTCCAAATGCAAGTTCCG   | 419           |           |            |
| Query 481      | CTTACCTGGAATACGCCACGGAATGATGTGTCGTGCACACAATGCTGACTTCTACAGC  | 540           |           |            |
| Sbjct 418      | CTTACCTGGAATACGCCACGGAATGATGTGTCGTGCACACAATGCTGACTTCTACAGC  | 359           |           |            |
| Query 541      | GCGGAGAATCTGCTCTCTCCAGGGGAAGCCGAAAGTTTCCAAAGGTCGTTGATCAAGC  | 600           |           |            |
| Sbjct 358      | GCGGAGAATCTGCTCTCTCCAGGGGAAGCCGAAAGTTTCCAAAGGTCGTTGATCAAGC  | 299           |           |            |
| Query 601      | TGCGCGGTTGTTTATCAAGCCTTACGTCACCGTAACCAAGCAATCAATATCACTGTG   | 660           |           |            |
| Sbjct 298      | TGCGCGGTTGTTTATCAAGCCTTACGTCACCGTAACCAAGCAATCAATATCACTGTG   | 239           |           |            |
| Query 661      | TGGCTTCAAGGCCGCAATCCACTGCGGAGCGTACAAATGTACGGCAGCAACGTCGGTTC | 720           |           |            |
| Sbjct 238      | TGGCTTCAAGGCCGCAATCCACTGCGGAGCGTACAAATGTACGGCAGCAACGTCGGTTC | 179           |           |            |
| Query 721      | GAGATGGCGCTGATGACGCCAATCTCTGATAGTTGAGTGATGACTTCGGCGATCAC    | 780           |           |            |
| Sbjct 178      | GAGATGGCGCTGATGACGCCAATCTCTGATAGTTGAGTGATGACTTCGGCGATCAC    | 119           |           |            |
| Query 781      | CGCTTCCCTCAT 792                                            |               |           |            |
| Sbjct 118      | CGCTTCCCTCAT 107                                            |               |           |            |

**Figure S5.** The sequencing results of recombinant plasmid pUC19-*C1ZC2-smr*. (the accession number of the nucleotide sequences was GenBank: AB448740.1).

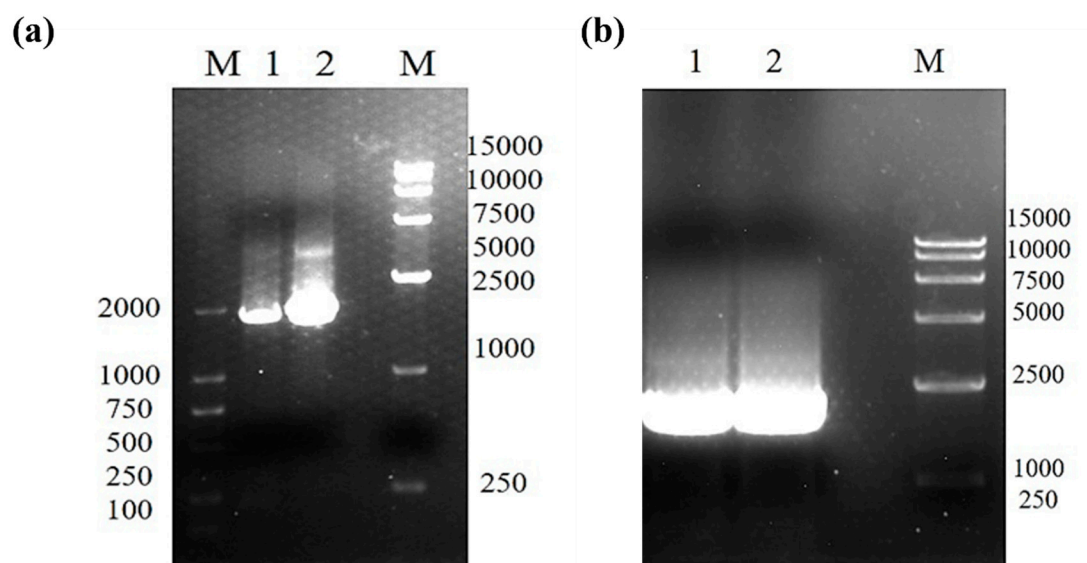

**Figure S6.** Electrophoretic target genes map. (a) *phaC1*, the left M: DNA Marker DL2000, 1-2: the PCR product of *phaC1*, the right M: DNA Marker DL15000; (b) *phaC2*, 1-2: the PCR product of *phaC2*, M: DNA Marker DL15000.

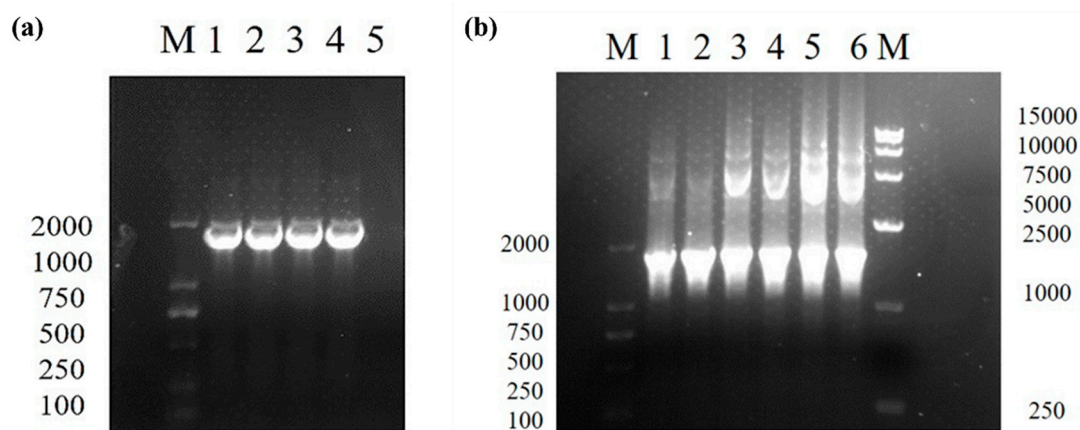

**Figure S7.** Electrophoresis results of PCR identification. (a) Recombinant plasmid *pk18-phaC1*, M: DNA Marker DL2000, 1: PCR product of *phaC1* gene, 2-4: PCR product of *pk18-phaC1*, 5: PCR product of pK18 empty vector; (b) Recombinant plasmid *pk18-phaC2*, M: DNA Marker DL2000, 1: PCR product of *phaC2* gene, 2-6: PCR product of *pk18-phaC2*, M: DNA Marker DL15000.

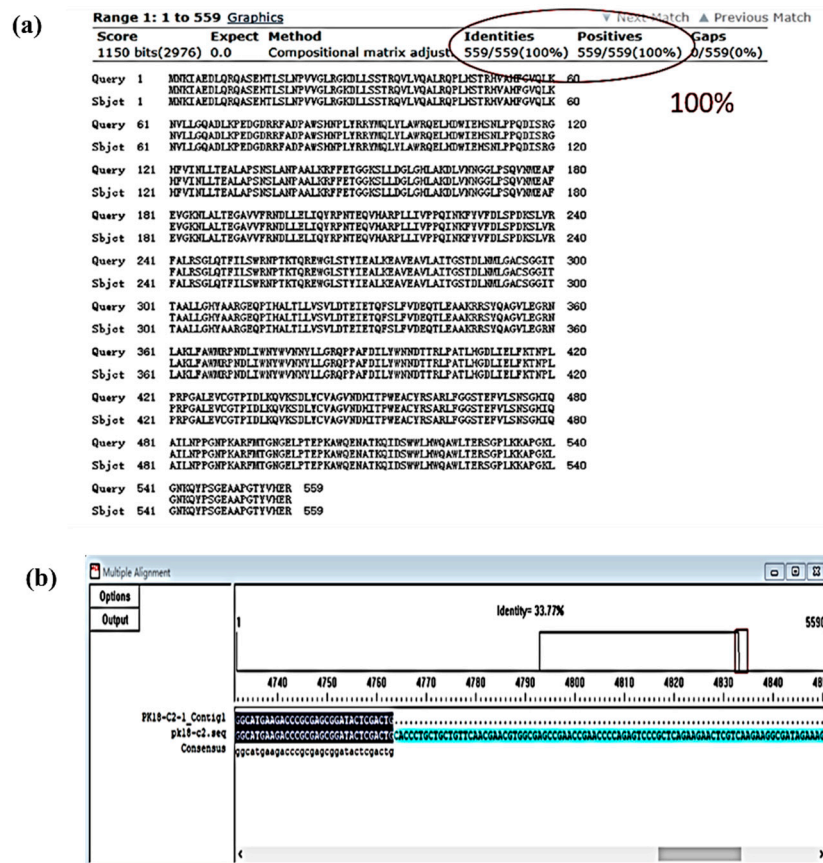

**Figure S8.** Comparison of sequencing results of recombinant plasmid (a) pK18-*phaC1*, (b) pK18-*phaC2*.

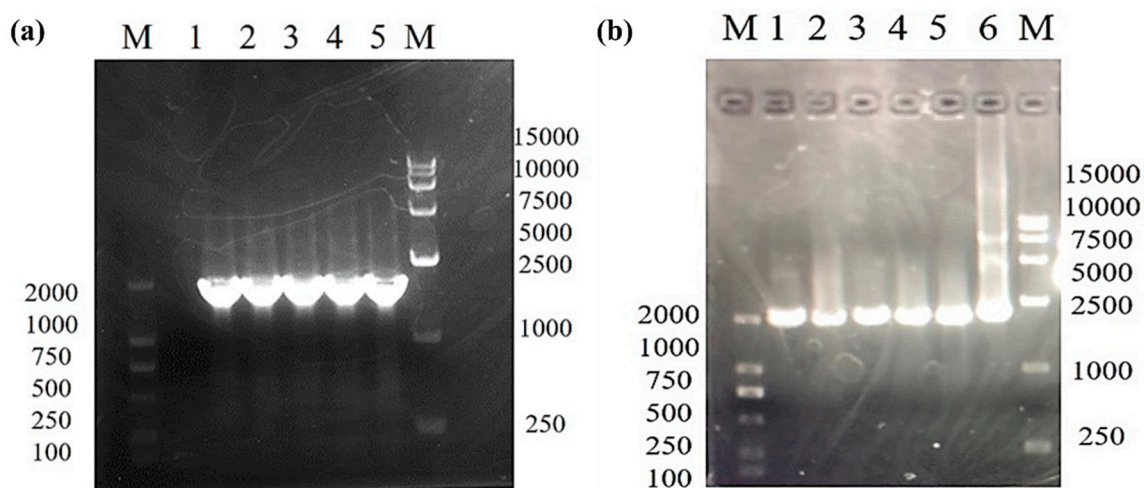

**Figure S9.** Electrophoresis results of PCR identification. (a) *Pseudomonas* sp. SG4502+ *tac-phaC1*, M: DNA Marker DL2000, 1-5: PCR product of *Pseudomonas* sp. SG4502+*tac-phaC1*, M: DNA Marker DL15000; (b) *Pseudomonas* sp. SG4502+ *tac-phaC2*, M: DNA Marker DL2000, 1-6: PCR product of *Pseudomonas* sp. SG4502+*tac-phaC2*, M: DNA Marker DL15000.

**Table S1.** Strains and plasmids used in this study.

| Strains and plasmids    | Related Information                                                                                                                                                                                                                                                                                                                                                                   | Source          |
|-------------------------|---------------------------------------------------------------------------------------------------------------------------------------------------------------------------------------------------------------------------------------------------------------------------------------------------------------------------------------------------------------------------------------|-----------------|
| Strains                 |                                                                                                                                                                                                                                                                                                                                                                                       |                 |
| <i>E. coli</i> DH5α     | Used for the construction of overexpressed plasmids;<br><i>F</i> <sup>-</sup> , $\phi 80$ <i>lacZ</i> Δ <i>M15</i> Δ ( <i>lacZYA-arg</i> <sup>+</sup> ) <i>U169</i> , <i>deoR</i> , <i>recA1</i> ,<br><i>endA1</i> , <i>hsdR17</i> ( <i>rK</i> <sup>+</sup> , <i>mk</i> <sup>+</sup> ), <i>phoA</i> , <i>supE44</i> , λ <sup>-</sup> , <i>thi-1</i> , <i>gyrA96</i> ,<br><i>relA1</i> | This laboratory |
| <i>E. coli</i> JM109    | Construction for knocking out plasmids; <i>recA1</i> , <i>endA1</i> ,<br><i>gyrA96</i> , <i>thi-1</i> , <i>hidR17</i> , <i>supE44</i> , <i>relA1</i> , Δ ( <i>lac</i> -<br><i>proAB</i> )/F'[ <i>traD36</i> , <i>proAB</i> <sup>+</sup> , <i>lac 1q</i> , <i>lacZ</i> Δ <i>M15</i> ]                                                                                                  | This work       |
| Plasmids                |                                                                                                                                                                                                                                                                                                                                                                                       |                 |
| pK18                    | Starting plasmid containing strong promoter <i>tac</i> , Used as a<br>gene booster; Km <sup>R</sup>                                                                                                                                                                                                                                                                                   | This work       |
| pUC19                   | Starting plasmid, used as gene knockout; Ap <sup>R</sup>                                                                                                                                                                                                                                                                                                                              | This laboratory |
| pCDFDuet-1              | The starting plasmid, which is used to provide the <i>Smr</i> gene<br>required for knockout; Sm <sup>R</sup>                                                                                                                                                                                                                                                                          | This laboratory |
| pK18- <i>phaC1</i>      | Recombinant plasmids for overexpression of the <i>phaC1</i> gene;<br>Km <sup>R</sup>                                                                                                                                                                                                                                                                                                  | This work       |
| pK18- <i>phaC2</i>      | Recombinant plasmids for overexpression of the <i>phaC1</i> gene;<br>Km <sup>R</sup>                                                                                                                                                                                                                                                                                                  | This work       |
| pUC19- <i>C1ZC2</i>     | Recombinant plasmids, knocked out intermediate plasmids<br>containing the <i>phaC1-phaZ-phaC2</i> gene; Ap <sup>R</sup> ; Sm <sup>R</sup>                                                                                                                                                                                                                                             | This work       |
| pUC19- <i>C1ZC2-smr</i> | Recombinant plasmid, knockout intermediate plasmid contain-<br>ing the <i>phaC1-phaZR-smr-phaZF-phaC2</i> gene; Ap <sup>R</sup> ; Sm <sup>R</sup>                                                                                                                                                                                                                                     | This work       |

**Table S2.** Primers used in this study.

| Primers     | Description                               | Source    |
|-------------|-------------------------------------------|-----------|
| phaC1-F     | CGGATCCCCGGGTACCGGGACAACGGAGCGTCGTCGTA    | This work |
| phaC1-R     | ACGAATTCGAGCTCGGCGGAACACGAAGGGGCTGGG      | This work |
| phaC2-F     | CTTGGTCGGTCATTTGGCAATCTGCAGCAGGCAGTC      | This work |
| phaC2-R     | GGACTCTGGGGTTTCGGTTCGGCTCGCCACGTTTCGTT    | This work |
| tac-phaC1-F | GATAAGCCCGGATCCCCGGGTACCGGGACA            | This work |
| tac-phaC1-R | ACGAATTCGAGCTCGGCGGAACACGAAGGGGCTGGG      | This work |
| tac-phaC2-F | CGGTCATTTGGCAATCTGCAGCAGG                 | This work |
| tac-phaC2-R | TCGCTCTCGTCGATCCACT                       | This work |
| q-phaC1-F   | TGTTCCGCAACGACCTGCTA                      | This work |
| q-phaC1-R   | GAATCGCACCAGGCTCTTGTC                     | This work |
| q-phaC2-F   | CGTCCGTTTCGCCGATCCCA                      | This work |
| q-phaC2-R   | TCGCTCTCGTCGATCCACT                       | This work |
| q-phaZ-F    | CCTTCGTGTTCCGCACCAT                       | This work |
| q-phaZ-R    | ACGTCGAAGGCGATCACCTC                      | This work |
| pC1ZC2-F    | GACGGCCAGTGAATTGGGAACAACGACACCACGCGCCTGCC | This work |
| pC1ZC2-R    | TGATTACGCCAAGCTAGCAGGTCGTCGATCAGGTGGCGCAG | This work |
| Smr-F       | GACCCTGCGCACCGCGACATAAGCGGCTATTTAACGACCC  | This work |
| Smr-R       | TGGAGGTAGCGCCGCGCCGACGTCTCACGCCCCGAGCGTA  | This work |
